1 “ARDS and Cytokine Storm in SARS-CoV-2 Infected Caribbean Vervets”

2  
3 <sup>1</sup>Robert V. Blair, <sup>1</sup>Monica Vaccari, <sup>1</sup>Lara A. Doyle-Meyers, <sup>1</sup>Chad J Roy, <sup>1</sup>Kasi Russell-  
4 Lodrigue, <sup>1</sup>Marissa Fahlberg, <sup>1</sup>Chris J. Monjure, <sup>1,2</sup>Brandon Beddingfield, <sup>3</sup>Kenneth S. Plante,  
5 <sup>3</sup>Jessica A. Plante, <sup>3</sup>Scott C. Weaver, <sup>1</sup>Xuebin Qin, <sup>1</sup>Cecily C. Midkiff, <sup>1</sup>Gabrielle Lehmicke,  
6 <sup>1</sup>Nadia Golden, <sup>1</sup>Breanna Threeton, <sup>1</sup>Toni Penney, <sup>1</sup>Carolina Allers, <sup>1</sup>Mary B Barnes, <sup>1</sup>Melissa  
7 Pattison, <sup>1</sup>Prasun K Datta, <sup>1</sup>Nicholas J Maness, <sup>1</sup>Angela Birnbaum, <sup>1</sup>Tracy Fischer, <sup>1</sup>Rudolf P.  
8 Bohm, \*<sup>1</sup>Jay Rappaport

9  
10 <sup>1</sup>Tulane National Primate Research Center, Covington, LA

11 <sup>2</sup>Tulane University School of Medicine, Department of Microbiology and Immunology, New  
12 Orleans, LA

13 <sup>3</sup> World Reference Center for Emerging Viruses and Arboviruses, Institute for Human Infections  
14 and Immunity, University of Texas Medical Branch, Galveston, TX

15

16

17 \*To whom correspondence should be addressed:

18

19 Jay Rappaport, Ph.D.

20 Director and Chief Academic Officer

21 Tulane National Primate Research Center

22 18703 Three Rivers Road, Covington, LA 70433

23

24 Tel. 985-871-6201

25 Fax. 985871, 6569

## 26 Abstract

27 **SARS-CoV-2 induces a wide range of disease severity ranging from asymptomatic**  
28 **infection, to a life-threatening illness, particularly in the elderly and persons with comorbid**  
29 **conditions. Up to now, SARS-CoV-2 has infected more than five million and led to more**  
30 **than 300,000 deaths worldwide. Among those persons with serious COVID-19 disease,**  
31 **acute respiratory distress syndrome (ARDS) is a common and often fatal presentation.**  
32 **SARS-CoV-2-induced ARDS is difficult to treat clinically, and new therapeutic strategies**  
33 **are needed. In order to evaluate such therapeutic strategies, animal models of SARS-CoV-2**  
34 **infection that manifest severe disease are needed. Here we report fatal ARDS in two**  
35 **African green monkeys (AGMs) infected with SARS-CoV-2 that demonstrated pathological**  
36 **lesions and disease similar to severe COVID-19 in humans. Moreover, we report the**  
37 **observation of cytokine release (cytokine storm) in three of four infected AGMs. All four**  
38 **animals showed increased levels of IL-6 in plasma, a predictive marker and presumptive**  
39 **therapeutic target in humans infected with SARS-CoV-2 infection. Our results suggest the**  
40 **AGM is a useful model to study disease pathogenesis of SARS-CoV-2, and for the**  
41 **evaluation of therapeutic interventions designed to combat serious pulmonary disease**  
42 **associated with this infection.**

43 The coronavirus disease-2019 (COVID-19) pandemic, caused by the novel coronavirus, severe  
44 acute respiratory syndrome coronavirus-2 (SARS-CoV-2), has resulted in the deaths of hundreds  
45 of thousands of people and has caused massive economic and health disruptions across the globe.  
46 This unprecedented level of disruption has been driven by two main features of SARS-CoV-2: its  
47 high rate of person-to-person transmissibility and the potential to cause severe, life-threatening,  
48 pneumonia. Although severe disease is only seen in a small subset of infected people<sup>1</sup>, it is this  
49 outcome and minimal understanding of its pathogenesis that has resulted in global unrest.  
50 Research into the causes and mechanisms of the most severe manifestations of COVID-19 is  
51 needed to inform and facilitate the development of prophylactic and therapeutic approaches that  
52 can prevent this life-threatening outcome.  
53

54 Infection with SARS-CoV-2 and development of COVID-19 results in a mild respiratory disease  
55 for most individuals. However, a small subset progress to develop severe respiratory disease  
56 which in some cases is fatal<sup>1</sup>. The most severely affected individuals often present with a fever,  
57 cough, dyspnea, and bilateral radiographic opacities that in the majority of critically ill patients  
58 progresses to acute respiratory distress syndrome (ARDS)<sup>2</sup>. The onset of ARDS is often  
59 associated with an increase in circulating pro-inflammatory cytokines resulting in a cytokine  
60 release syndrome colloquially referred to as a “cytokine storm”<sup>3,4</sup>. Interleukin-6 (IL-6), in  
61 particular has been shown to correlate with radiographic scores in patients with SARS-CoV-2  
62 infection<sup>5</sup>. Worsening of disease can be seen in the context of declining viral loads and markedly  
63 elevated cytokines suggesting a role for these inflammatory responses in disease progression and  
64 immunopathology<sup>6</sup>. Despite extensive research during both the SARS-CoV and the Middle East  
65 respiratory syndrome (MERS) outbreaks, the factors that drive this inflammatory response are  
66 still poorly understood.

67 Animal models have been used extensively during previous outbreaks of SARS-CoV<sup>7-10</sup> and  
68 MERS<sup>11-13</sup> to model disease progression and to test vaccines and therapeutics<sup>14</sup>. Nonhuman  
69 primates (NHPs) are ideally suited to model respiratory human viral infections primarily because  
70 of the similarities in respiratory anatomy and immunologic responses when compared to other  
71 animal species. Several NHP species have been used in the past to model infections with both  
72 SARS-CoV and MERS including marmosets (*Callithrix jacchus*)<sup>10,12,15</sup>, rhesus macaques  
73 (*Macaca mulatta*)<sup>12,13,16,17</sup>, cynomolgus macaques (*Macaca fascicularis*)<sup>7,8,17</sup>, and African green  
74 monkeys (*Chlorocebus aethiops*)<sup>8,9,17</sup>. All these species have been shown to be susceptible to  
75 infection with these viruses and develop mild to moderate disease, but none have been able to  
76 recapitulate the rapid clinical deterioration seen in people with severe disease and ARDS. NHP  
77 models capable of recapitulating the entire spectrum of SARS-CoV-2 manifestations, from mild  
78 to severe disease, are urgently needed to test the efficacy of vaccines and medical  
79 countermeasures that are currently being developed in response to COVID-19.

80 Here we report the sudden and rapid health deterioration of two out of four AGMs  
81 experimentally infected with SARS-CoV-2. The two effected animals developed pneumonia,  
82 ARDS and a cytokine storm similar to the complications reported in 5-13% of COVID-19  
83 patients<sup>18</sup>.

#### 84 **ARDS in SARS-CoV-2 infected AGMs**

85 Four, aged, AGMs were exposed by two routes to SARS-CoV-2 isolate USA-WA1/2020. Two  
86 animals were exposed via small particle aerosol (AGM1, AGM4) resulting in an inhaled dose of  
87  $2.0 \times 10^3$  and  $2.5 \times 10^3$  PFU, respectively. Two AGMs were exposed via multiple route installation  
88 (AGM 2, AGM3) including conjunctival, intratracheal, oral, and intranasal exposure resulting in  
89 a cumulative dose of  $3.61 \times 10^6$  PFU (Extended Data Table 1). SARS-CoV-2 was detectable in  
90 swabs obtained from mucosal sites in all four animals. Viral load peaked between 3- and 7- days  
91 post inoculation (DPI) and persisted throughout the course of the study in pharyngeal and nasal  
92 swabs as well as bronchial brush samples (Figure 1). The highest levels of virus were detected in  
93 the pharynx and nasal cavity with peaks at  $10^7$ - $10^{11}$  and  $10^8$ - $10^9$  copies per swab, respectively.  
94 Rectal swabs contained high viral load similar to reports in humans<sup>19,20</sup>; however, with dissimilar  
95 kinetics relative to virus detected in other sites. Virus was also detected in vaginal swabs of the  
96 two female AGMs in contrast to reports in human subjects<sup>21</sup>. Despite the three-log difference in  
97 exposure dose, no significant difference was observed in the viral load or kinetics when the two  
98 routes of exposure were compared.

99 After SARS-CoV-2 exposure, animals were followed up to four weeks post-infection with  
100 regular clinical assessment that included physical exam, pulse oximetry, and plethysmography.  
101 Clinical findings during the first 6 DPI included mild transient changes in SpO<sub>2</sub> and appetite  
102 (Extended Data Figure 1). At 7 DPI all animals underwent a complete physical evaluation and an  
103 extensive sample collection protocol including fluid (urine, CSF, BAL, and vaginal and rectal  
104 weks), stool, swab (buccal, nasal, and pharyngeal), and bronchial brush collection, no remarkable  
105 findings were noted. That afternoon (7 DPI), AGM1 developed mild tachypnea that progressed  
106 to severe respiratory distress in less than 24 hours. On the morning of the 8 DPI, the animal was  
107 discovered recumbent and exam findings included dyspnea, tachypnea, hypothermia, and an

108 SpO<sub>2</sub> of 77% under oxygen supplementation (Extended Data Figure 1c, e, f). This differed from  
109 reports of critically ill SARS-CoV-2 patients which often present with fever in addition to  
110 dyspnea<sup>2</sup>. On 21 DPI the three remaining animals underwent another complete evaluation.  
111 During the morning exam on 22 DPI, AGM2 began exhibiting tachypnea that progressed to  
112 severe respiratory distress by that afternoon. The onset, clinical presentation, and rate of  
113 progression of disease in AGM2 was similar to AGM1 and included dyspnea, tachypnea,  
114 hypothermia, and a SpO<sub>2</sub> of 77% on ambient air.

115 Thoracic radiographs for AGM1 and AGM2 revealed a diffuse alveolar pattern of disease  
116 throughout the right lung fields and a lobar sign in the caudal dorsal lung field. These findings  
117 were in stark contrast to the radiographs from the day before (Figure 2a, b). CBC showed an  
118 elevated WBC with a mature neutrophilia and a normal lymphocyte count that resulted in an  
119 elevated neutrophil-to-lymphocyte ratio (NLR) (Extended Data 2a, f). Serum chemistries  
120 revealed hypoproteinemia, and an elevated glucose and mild to moderate elevation in BUN for  
121 both animals. Creatinine, and AST were also mildly elevated in AGM1 (Extended Data Figure  
122 3a, d-f, h). The radiographic presentation in severe human COVID-19 is similar and  
123 characterized by bilateral, peripheral, ill-defined ground glass opacifications that mainly involve  
124 the right lower lobe<sup>22</sup>. An elevation in the NLR has been identified as an independent risk factor  
125 for mortality in hospitalized patients with SARS-CoV-2, and increased NLR significantly  
126 correlated with elevations in AST, glucose, BUN, and creatinine in these patients<sup>23</sup>. The  
127 constellation of hematologic changes in AGM1 and AGM2 is therefore similar to the changes  
128 observed in human COVID-19 patients with increased NLR; however in humans, increased NLR  
129 is often associated with lymphopenia<sup>24</sup> which was not observed in these two animals.

130 Due to their rapidly declining clinical condition AGM1 and AGM2 were euthanized and a  
131 necropsy was performed at 8 and 22 DPI, respectively. The two remaining animals, AGM3 and  
132 AGM4 (multiroute and aerosol exposure respectively) reached the study endpoint with no  
133 significant changes in clinical parameters.

### 134 **Cytokine storm in two AGMs with, and one without, ARDS**

135 Cytokine release syndrome has been observed in a subgroup of patients with severe COVID-19  
136 pneumonia<sup>25</sup>. In these patients the disease progresses rapidly, and mortality is high. A panel of  
137 cytokines was measured in plasma at baseline and during the course of infection. Interferon  
138 gamma (IFN $\gamma$ ) responses increased at 1 week post infection in all animals as shown by the heat  
139 map and the radial plot in Figure 3a, b. IFN $\gamma$  levels were higher in AGM1 and AGM2 and were  
140 associated with viral RNA in the bronchial brushes at the same time point (1 week) (Figure 3c,  
141 d).

142 A group of cytokines similar to what is observed in human COVID-19 was upregulated in  
143 AGM1 and AGM2 at the time of necropsy compared to baseline levels in the two animals that  
144 progressed to ARDS (Figure 3a, b). Elevated markers included IL-6, IL-4/IL-13, IL-8, IL-1 $\beta$  and  
145 TNF $\alpha$  consistent with cytokine storm. AGM3 and AGM4 did not develop ARDS; however,  
146 AGM4 showed increased cytokine concentrations and evidence of cytokine storm. AGM3 had

147 increased levels of IL-10 both at week 1 and necropsy and was notable for having the least  
148 severe disease of the group.

#### 149 **Absence of SARS-CoV-2 antibody titers in animals with ARDS**

150 Binding IgG antibody to S1 and S2 subunits of the spike protein (Wuhan-Hu 1 strain) were  
151 measured at pre-infection and terminally for all animals by ELISA. Antibodies were not detected  
152 prior to infection in any of the animals used in this infection study. Antibodies remained  
153 undetectable in the 2 animals that progressed to ARDS (AGM1, 8 DPI; AGM2, DPI). Both  
154 animals that survived to the end of the study with no observable clinical disease had detectable  
155 circulating antibodies (Extended Data Figure 5).

#### 156 **Pulmonary pathology in AGMs with ARDS**

157 Gross postmortem examination of AGM1 and AGM2 revealed severe consolidation and edema  
158 in the right caudal lung lobe with generalized failure to collapse of the remaining lobes,  
159 consistent with a bronchointerstitial pneumonia (Figure 2c, d). In AGM2 (multiroute exposure)  
160 pulmonary hemorrhage was also noted near the dorsal margin of the right caudal lung lobe.  
161 AGM3 had multifocal pleural adhesions between the left caudal lung lobe and the diaphragm  
162 that was interpreted as being unrelated to SARS-CoV-2 infection based on the chronicity of the  
163 lesion and the history of the animal. The lungs of AGM4 were grossly normal. No significant  
164 abnormalities were noted outside the pulmonary changes in any of the four AGMs.

165  
166 Histopathologic findings in AGM1 and AGM2 were similar and characterized by alveoli that  
167 were filled with fibrin, hemorrhage, and proteinaceous fluid. Alveoli were multifocally lined by  
168 hyaline membranes and/or type II pneumocytes, consistent with diffuse alveolar damage.  
169 Bronchial and alveolar septal necrosis were present within severely affected lung lobes  
170 characterized by a loss of epithelial lining cells and infiltration by neutrophils with lesser  
171 numbers of lymphocytes and histiocytes (Figure 4a, b). In AGM1, type II pneumocytes  
172 frequently exhibited atypia and occasionally contained mitotic figures. Regions of the lung from  
173 AGM1 also had organization of intra-alveolar fibrin with infiltration by spindle cells and lining  
174 by type II pneumocytes, consistent with early organizing pneumonia. Low numbers of  
175 multinucleated giant cell syncytia were scattered throughout alveoli (Figure 4c). Fluorescent  
176 immunohistochemistry identified low numbers of type II pneumocytes and alveolar macrophages  
177 that were positive for SARS-CoV-2 nucleoprotein within the affected lungs from AGM1, but not  
178 AGM2. (Figure 4d). AGM4 had multifocal, mild to moderate, interstitial pneumonia scattered  
179 throughout all lung lobes characterized by a mixed infiltrate of neutrophils, lymphocytes, and  
180 histiocytes. Multinucleated giant cell syncytia and atypical pneumocyte hyperplasia were rarely  
181 observed in all lung lobes. AGM3 had scant inflammation in all lung lobes examined. Viral load  
182 was not significantly associated with pulmonary pathology; however, the two animals that  
183 developed diffuse alveolar damage showed higher viral loads in bronchi.

#### 185 **Discussion**

187 Exposure of African green monkeys to SARS-CoV-2 resulted in the development of spontaneous  
188 ARDS in two of four animals studied. Although severe pathologic changes have been described  
189 in AGMs euthanized at early time points post infection<sup>8</sup>, the rapid clinical decline with



190 progression to ARDS seen in the most severe cases of COVID -19 patients has not been reported  
191 in NHP models<sup>9,17,26</sup>. Our findings show that AGMs are capable of recapitulating the severe  
192 disease manifestations seen in people, both at the pathological and immunological level.

193 Several predisposing conditions are known to increase the likelihood of developing severe  
194 disease in people following infection with SARS-CoV-2. Age<sup>2</sup>, weight<sup>27</sup>, and sex<sup>2,28</sup> at one point  
195 have been identified as potential predisposing factors for developing severe disease. All of the  
196 AGMs included in our study were aged, with an estimated age of 16 years old, which may  
197 explain why prior studies using AGMs to model respiratory coronavirus infections have not  
198 shown the ARDS-phenotype observed in our study. Both animals that progressed to severe  
199 disease were female and low weight. This differs from what is reported in COVID-19 patients in  
200 which male gender<sup>29,30</sup> and obesity<sup>27</sup> have been shown to have a higher prevalence of severe  
201 disease.

202 There are animal characteristics that may have influenced the outcome of this study. The AGMs  
203 used in this infection study were imported from nondomestic sources. Detailed longitudinal  
204 information usually available in domestic breeding colonies (*e.g.* medical history, housing, diet)  
205 was not available. All animals used on the study were found to be in excellent health upon  
206 importation and underwent an unremarkable 90-day quarantine period prior to use. All animals  
207 were examined, and screened for viral, bacterial, and parasitic infections prior to inclusion as  
208 subjects on this study. Although the animals were deemed clinically healthy at the time of  
209 initiation of the study, there may have been historical factors that predisposed them to enhanced  
210 COVID-19 disease.

211 The pathogenesis of ARDS is still poorly understood. ARDS has multiple causes and several  
212 animal models have been utilized in the past to study this syndrome. These include models of  
213 sepsis, hyperoxia, aerosolized toxin<sup>31</sup>, and acid aspiration<sup>32</sup>. These models have highlighted the  
214 importance of the innate host immune response in the development of acute lung injury.  
215 Proinflammatory cytokines including TNF $\alpha$ , IL-1 $\beta$ , IL-8, IL-6, G-CSF, MCP-1, and MIP-1 have  
216 been shown to be elevated during the acute phases of acute lung injury (ALI)<sup>33</sup>. Indeed,  
217 overexpression of several of these cytokines were observed in both animals that progressed to  
218 ARDS. This differed from the cytokine profile in the animals that reached study endpoint. Of  
219 these animals, only a few cytokines (IL-6, IL-8 and IL-10) were elevated in AGM3; whereas,  
220 AGM4 exhibited an intermediate phenotype with increased levels of several cytokines (IL-1 $\beta$ ,  
221 TNF $\alpha$ , IL-8, IL-13, and IL-4 but not IL-10). Interestingly, at 7 DPI all four animals had  
222 increased levels of IFN $\gamma$ , with the two progressors having the highest plasma concentration. The  
223 IFN $\gamma$  plasma levels at 7 DPI were positively associated with viral load in bronchial brush  
224 samples at the same time ( $p=0.015$ ,  $R=0.99$ , Pearson test) suggesting that viral load may be  
225 driving the IFN $\gamma$  response. Some groups have proposed that IFN $\gamma$  production maybe favorable to  
226 the virus through upregulation of ACE2 from IFN $\gamma$  stimulation<sup>34</sup>. Thus, elevated IFN $\gamma$  in plasma  
227 could be explored as a potential biomarker for advanced disease in people.

228 In human COVID-19, circulating IL-6 correlates with radiographic abnormalities of pneumonia<sup>3</sup>,  
229 and was found to be upregulated in both animals that progressed to ARDS and also elevated in  
230 the animals without ARDS, albeit to a lesser degree (Figure 3b). Immunohistochemistry

231 identified low numbers of virally infected cells localized in multifocal clusters. The localized  
232 distribution taken together with the widespread pathology, and the lack of detectable virus by  
233 IHC in one of the two AGMs that progressed to ARDS, suggests that the development of ARDS  
234 may not be due to direct viral effects and highlights the potential importance of cytokine storm in  
235 ARDS progression in these two animals.

236 Previous studies on SARS-CoV have shown the protective effects of neutralizing antibodies in  
237 immunized animal models<sup>35-37</sup>. No data is yet available on the role of non-neutralizing binding  
238 antibodies in disease progression; however, it is interesting to note that neither of the progressors  
239 had detectable spike (S) specific IgG antibodies at the terminal time point. This is in stark  
240 contrast to both surviving AGMs that had circulating anti-S IgG antibodies. The terminal sample  
241 from AGM1 was acquired 8 DPI which may have been too early to demonstrate an IgG-type  
242 response. But, the sample from AGM2 was acquired at 22 DPI and therefore an antibody  
243 response would have been expected based on the timing of the responses in AGMs 3 and 4  
244 (without disease). Further investigation is needed to determine if these antibodies were  
245 neutralizing, and the mechanisms underlying the restricted antibody response observed in the  
246 two progressors.

247 The clinical progression in both animals was fulminant, and neither animal demonstrated  
248 significant abnormalities on any of our diagnostic assays until the day of their progression. This  
249 emphasizes the need for the development of better diagnostic tests that can more accurately  
250 predict disease outcome. Animal models are ideally suited for these types of investigational  
251 studies where infection takes place in a controlled setting, and repeated, longitudinal sampling  
252 can occur at key acute time points. Identification of early clinical and immunological biomarkers  
253 that are predictive of mortality and disease severity will also facilitate disease management.

254 This study demonstrates that following exposure to SARS-CoV-2 AGMs develop a spectrum of  
255 disease, from mild to severe COVID-19, which in some cases progress to ARDS. The cytokine  
256 expression profile in the two animals that developed ARDS is similar to the severe disease  
257 phenotype in people. Exploratory disease model development plays a crucial role in elucidating  
258 the early pathogenic mechanisms and predictors of disease outcome for emerging infectious  
259 diseases like SARS-CoV-2.

260

261

- 262 1 Wu, Z. & McGoogan, J. M. Characteristics of and Important Lessons From the Coronavirus  
263 Disease 2019 (COVID-19) Outbreak in China: Summary of a Report of 72314 Cases From the  
264 Chinese Center for Disease Control and Prevention. *JAMA*, doi:10.1001/jama.2020.2648 (2020).
- 265 2 Yang, X. *et al.* Clinical course and outcomes of critically ill patients with SARS-CoV-2 pneumonia  
266 in Wuhan, China: a single-centered, retrospective, observational study. *Lancet Respir Med* **8**,  
267 475-481, doi:10.1016/S2213-2600(20)30079-5 (2020).
- 268 3 Chien, J. Y., Hsueh, P. R., Cheng, W. C., Yu, C. J. & Yang, P. C. Temporal changes in  
269 cytokine/chemokine profiles and pulmonary involvement in severe acute respiratory syndrome.  
270 *Respirology* **11**, 715-722, doi:10.1111/j.1440-1843.2006.00942.x (2006).

- 271 4 Channappanavar, R. & Perlman, S. Pathogenic human coronavirus infections: causes and  
272 consequences of cytokine storm and immunopathology. *Semin Immunopathol* **39**, 529-539,  
273 doi:10.1007/s00281-017-0629-x (2017).
- 274 5 McGonagle, D., Sharif, K., O'Regan, A. & Bridgewood, C. The Role of Cytokines including  
275 Interleukin-6 in COVID-19 induced Pneumonia and Macrophage Activation Syndrome-Like  
276 Disease. *Autoimmun Rev* **19**, 102537, doi:10.1016/j.autrev.2020.102537 (2020).
- 277 6 Weiss, S. R. & Leibowitz, J. L. Coronavirus pathogenesis. *Adv Virus Res* **81**, 85-164,  
278 doi:10.1016/B978-0-12-385885-6.00009-2 (2011).
- 279 7 Lawler, J. V. *et al.* Cynomolgus macaque as an animal model for severe acute respiratory  
280 syndrome. *PLoS medicine* **3**, e149, doi:10.1371/journal.pmed.0030149 (2006).
- 281 8 Smits, S. L. *et al.* Distinct severe acute respiratory syndrome coronavirus-induced acute lung  
282 injury pathways in two different nonhuman primate species. *Journal of virology* **85**, 4234-4245,  
283 doi:10.1128/JVI.02395-10 (2011).
- 284 9 Clay, C. C. *et al.* Severe acute respiratory syndrome-coronavirus infection in aged nonhuman  
285 primates is associated with modulated pulmonary and systemic immune responses. *Immun*  
286 *Ageing* **11**, 4, doi:10.1186/1742-4933-11-4 (2014).
- 287 10 Greenough, T. C. *et al.* Pneumonitis and multi-organ system disease in common marmosets  
288 (*Callithrix jacchus*) infected with the severe acute respiratory syndrome-associated coronavirus.  
289 *The American journal of pathology* **167**, 455-463, doi:10.1016/S0002-9440(10)62989-6 (2005).
- 290 11 Yeung, M. L. *et al.* MERS coronavirus induces apoptosis in kidney and lung by upregulating  
291 Smad7 and FGF2. *Nat Microbiol* **1**, 16004, doi:10.1038/nmicrobiol.2016.4 (2016).
- 292 12 Baseler, L. J. *et al.* An Acute Immune Response to Middle East Respiratory Syndrome  
293 Coronavirus Replication Contributes to Viral Pathogenicity. *The American journal of pathology*  
294 **186**, 630-638, doi:10.1016/j.ajpath.2015.10.025 (2016).
- 295 13 de Wit, E. *et al.* Prophylactic and therapeutic remdesivir (GS-5734) treatment in the rhesus  
296 macaque model of MERS-CoV infection. *Proceedings of the National Academy of Sciences of the*  
297 *United States of America* **117**, 6771-6776, doi:10.1073/pnas.1922083117 (2020).
- 298 14 Datta, P. K. L., F; Fischer, T; Rappaport, J; and Qin, X. SARS-CoV-2 pandemic and research gaps:  
299 Understanding SARS-CoV-2 interaction with the ACE2 receptor and implications for therapy.  
300 *Theranostics*, doi:10.7150/thno.48076 (2020).
- 301 15 Chan, J. F. *et al.* Treatment With Lopinavir/Ritonavir or Interferon-beta1b Improves Outcome of  
302 MERS-CoV Infection in a Nonhuman Primate Model of Common Marmoset. *The Journal of*  
303 *infectious diseases* **212**, 1904-1913, doi:10.1093/infdis/jiv392 (2015).
- 304 16 Lan, J. *et al.* Recombinant Receptor Binding Domain Protein Induces Partial Protective Immunity  
305 in Rhesus Macaques Against Middle East Respiratory Syndrome Coronavirus Challenge.  
306 *EBioMedicine* **2**, 1438-1446, doi:10.1016/j.ebiom.2015.08.031 (2015).
- 307 17 McAuliffe, J. *et al.* Replication of SARS coronavirus administered into the respiratory tract of  
308 African Green, rhesus and cynomolgus monkeys. *Virology* **330**, 8-15,  
309 doi:10.1016/j.virol.2004.09.030 (2004).
- 310 18 Hu, Y. *et al.* Prevalence and severity of corona virus disease 2019 (COVID-19): A systematic  
311 review and meta-analysis. *J Clin Virol* **127**, 104371, doi:10.1016/j.jcv.2020.104371 (2020).
- 312 19 Wang, W. *et al.* Detection of SARS-CoV-2 in Different Types of Clinical Specimens. *JAMA*,  
313 doi:10.1001/jama.2020.3786 (2020).
- 314 20 To, K. K. *et al.* Temporal profiles of viral load in posterior oropharyngeal saliva samples and  
315 serum antibody responses during infection by SARS-CoV-2: an observational cohort study.  
316 *Lancet Infect Dis* **20**, 565-574, doi:10.1016/S1473-3099(20)30196-1 (2020).



- 317 21 Qiu, L. *et al.* SARS-CoV-2 is not detectable in the vaginal fluid of women with severe COVID-19  
318 infection. *Clinical infectious diseases : an official publication of the Infectious Diseases Society of*  
319 *America*, doi:10.1093/cid/ciaa375 (2020).
- 320 22 Shi, H. *et al.* Radiological findings from 81 patients with COVID-19 pneumonia in Wuhan, China:  
321 a descriptive study. *Lancet Infect Dis* **20**, 425-434, doi:10.1016/S1473-3099(20)30086-4 (2020).
- 322 23 Liu, Y. *et al.* Neutrophil-to-lymphocyte ratio as an independent risk factor for mortality in  
323 hospitalized patients with COVID-19. *J Infect*, doi:10.1016/j.jinf.2020.04.002 (2020).
- 324 24 Fan, B. E. *et al.* Hematologic parameters in patients with COVID-19 infection. *Am J Hematol* **95**,  
325 E131-E134, doi:10.1002/ajh.25774 (2020).
- 326 25 Huang, C. *et al.* Clinical features of patients infected with 2019 novel coronavirus in Wuhan,  
327 China. *Lancet* **395**, 497-506, doi:10.1016/S0140-6736(20)30183-5 (2020).
- 328 26 Clay, C. *et al.* Primary severe acute respiratory syndrome coronavirus infection limits replication  
329 but not lung inflammation upon homologous rechallenge. *Journal of virology* **86**, 4234-4244,  
330 doi:10.1128/JVI.06791-11 (2012).
- 331 27 Simonnet, A. *et al.* High prevalence of obesity in severe acute respiratory syndrome coronavirus-  
332 2 (SARS-CoV-2) requiring invasive mechanical ventilation. *Obesity (Silver Spring)*,  
333 doi:10.1002/oby.22831 (2020).
- 334 28 Walter, L. A. & McGregor, A. J. Sex- and Gender-specific Observations and Implications for  
335 COVID-19. *West J Emerg Med*, doi:10.5811/westjem.2020.4.47536 (2020).
- 336 29 Jin, J. M. *et al.* Gender Differences in Patients With COVID-19: Focus on Severity and Mortality.  
337 *Front Public Health* **8**, 152, doi:10.3389/fpubh.2020.00152 (2020).
- 338 30 Dudley, J. P. & Lee, N. T. Disparities in Age-Specific Morbidity and Mortality from SARS-CoV-2 in  
339 China and the Republic of Korea. *Clinical infectious diseases : an official publication of the*  
340 *Infectious Diseases Society of America*, doi:10.1093/cid/ciaa354 (2020).
- 341 31 Roy, C. J. *et al.* Rescue of rhesus macaques from the lethality of aerosolized ricin toxin. *JCI*  
342 *insight* **4**, doi:10.1172/jci.insight.124771 (2019).
- 343 32 Matute-Bello, G., Frevert, C. W. & Martin, T. R. Animal models of acute lung injury. *Am J Physiol*  
344 *Lung Cell Mol Physiol* **295**, L379-399, doi:10.1152/ajplung.00010.2008 (2008).
- 345 33 O'Grady, N. P. *et al.* Local inflammatory responses following bronchial endotoxin instillation in  
346 humans. *Am J Respir Crit Care Med* **163**, 1591-1598, doi:10.1164/ajrccm.163.7.2009111 (2001).
- 347 34 Ziegler, C. G. K. *et al.* SARS-CoV-2 Receptor ACE2 Is an Interferon-Stimulated Gene in Human  
348 Airway Epithelial Cells and Is Detected in Specific Cell Subsets across Tissues. *Cell*,  
349 doi:10.1016/j.cell.2020.04.035 (2020).
- 350 35 Yang, Z. Y. *et al.* A DNA vaccine induces SARS coronavirus neutralization and protective  
351 immunity in mice. *Nature* **428**, 561-564, doi:10.1038/nature02463 (2004).
- 352 36 Bukreyev, A. *et al.* Mucosal immunisation of African green monkeys (*Cercopithecus aethiops*)  
353 with an attenuated parainfluenza virus expressing the SARS coronavirus spike protein for the  
354 prevention of SARS. *Lancet* **363**, 2122-2127, doi:10.1016/S0140-6736(04)16501-X (2004).
- 355 37 Qin, E. *et al.* Immunogenicity and protective efficacy in monkeys of purified inactivated Vero-cell  
356 SARS vaccine. *Vaccine* **24**, 1028-1034, doi:10.1016/j.vaccine.2005.06.038 (2006).
- 357 38 Hartings, J. M. & Roy, C. J. The automated bioaerosol exposure system: preclinical platform  
358 development and a respiratory dosimetry application with nonhuman primates. *J Pharmacol*  
359 *Toxicol Methods* **49**, 39-55, doi:10.1016/j.vascn.2003.07.001 (2004).
- 360 39 Kolde, R. pheatmap: Pretty Heatmaps. *R package version 1.0.12* (2018).
- 361 40 Team, R. C. R: A language and environment for statistical computing. *R Foundation for Statistical*  
362 *Computing* (2019).
- 363 41 Wickham, H. ggplot2: Elegant Graphics for Data Analysis. (2016).

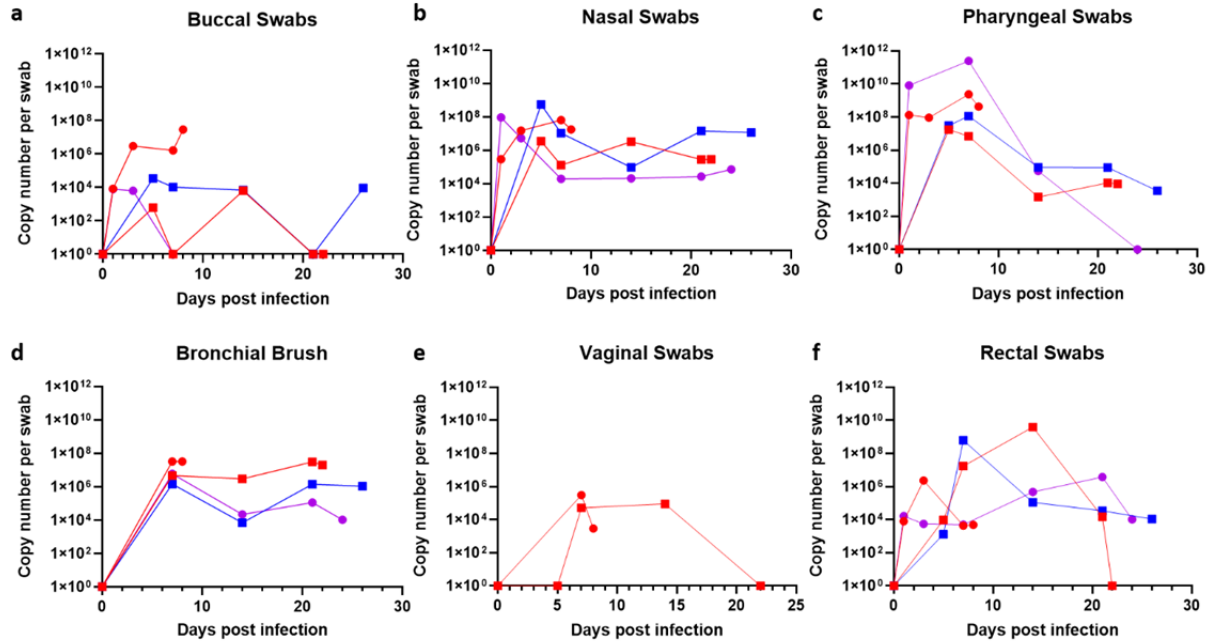

364

365 **Figure 1 | Quantification of viral loads from mucosal swabs.** All four African green monkeys  
366 had detectable virus at all mucosal sites. No significant differences were noted between viral  
367 load and route of exposure. Animals with pathology trended to high viral loads in bronchial  
368 brush samples. Circles: aerosol exposure; Squares: multiroute exposure; Red: developed ARDS;  
369 Purple: cytokine storm without ARDS; Blue: no cytokine storm or ARDS.

370

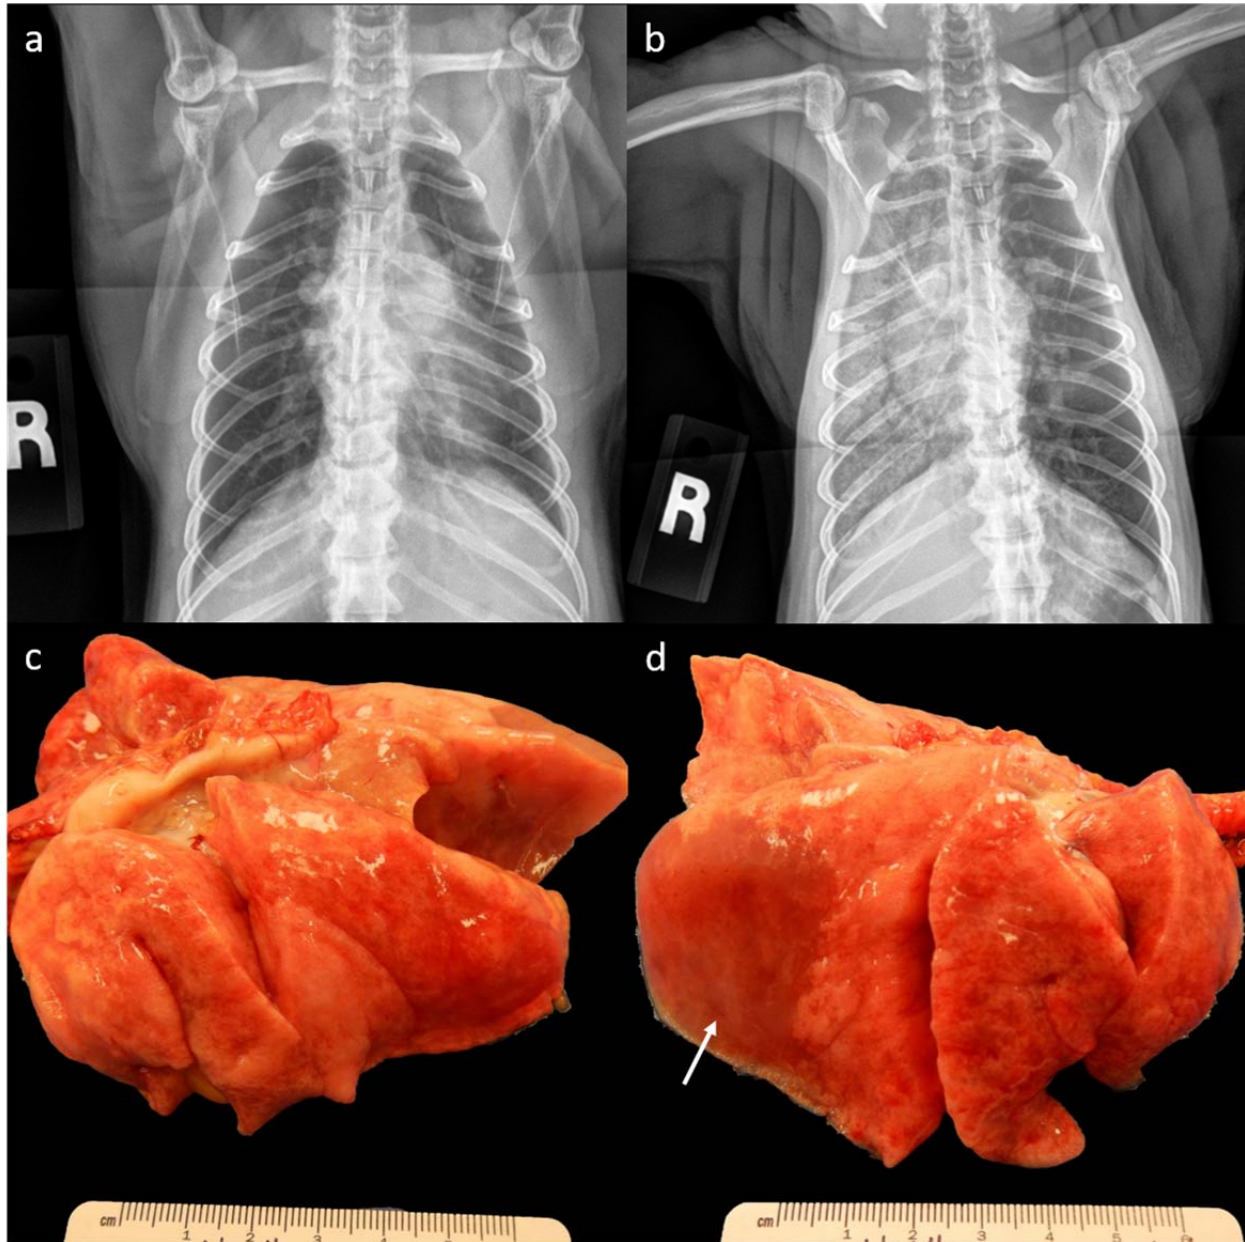

371

372 **Figure 2 | Radiographic and gross pathologic changes in CoV-2 exposed African green**  
373 **monkey, AGM1.** Radiographs 22 hours before (a) and at the time of necropsy (b) showing the  
374 rapid development of alveolar lung opacities throughout the right lung lobes. (c) The left  
375 lobes fail to collapse. (d) There is extensive consolidation of the right lower lung lobe with  
376 pulmonary edema (arrow). The right middle and anterior lobes are less affected. On cut surface  
377 all lobes ooze copious fluid.

378

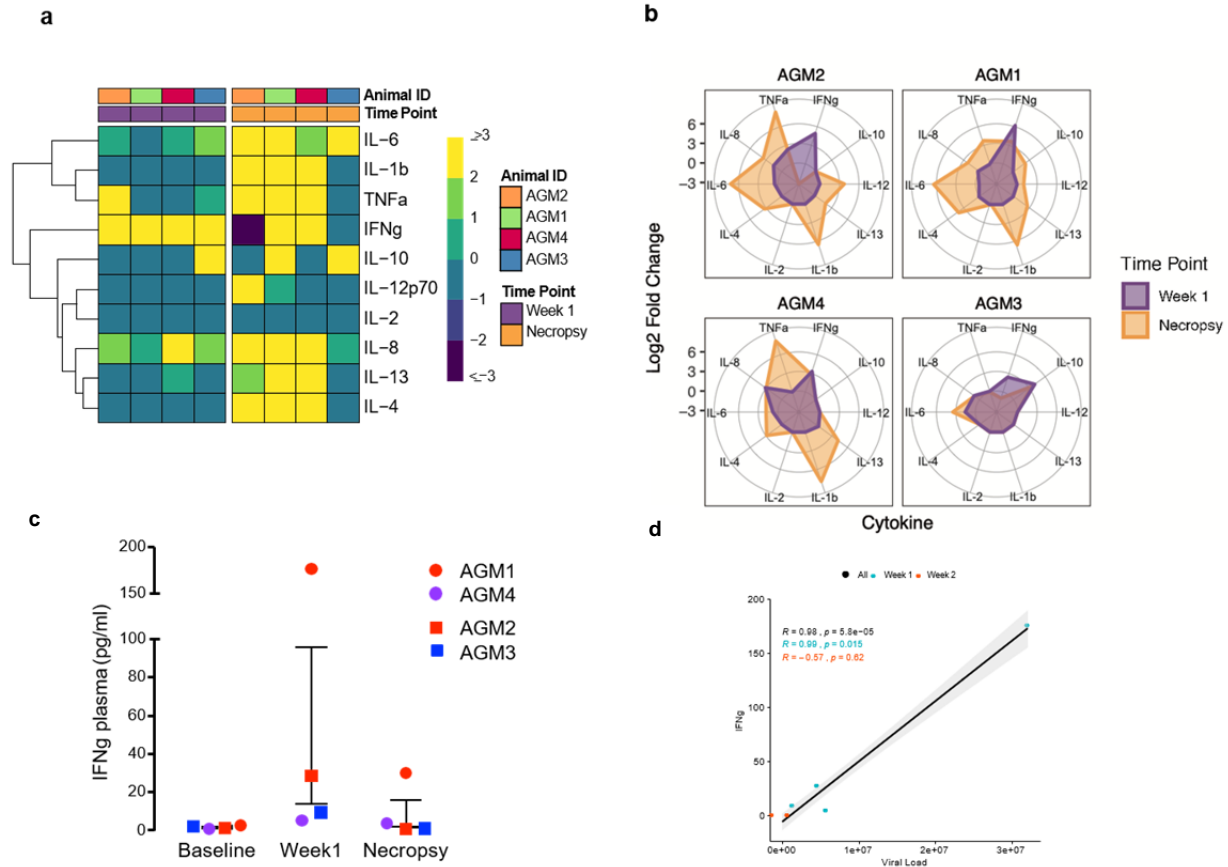

379

380 **Figure 3 | Cytokine release in SARS-CoV-2 infected AGMs.** Heat map (a) and radial plots (b)  
 381 showing changes in the levels of ten cytokines in plasma at week 1 and necropsy respect to the  
 382 baseline. Data are normalized (log2). (c) Levels of IFN $\gamma$  (pg/ml) in plasma at baseline week 1  
 383 and at necropsy. (d) Association between IFN levels at week 1 and viral load in bronchiolar  
 384 brushes (Pearson test with 95% CI). Circles: aerosol exposure; Squares: multiroute exposure;  
 385 Red: developed ARDS; Purple: cytokine storm without ARDS; Blue: no cytokine storm or  
 386 ARDS.



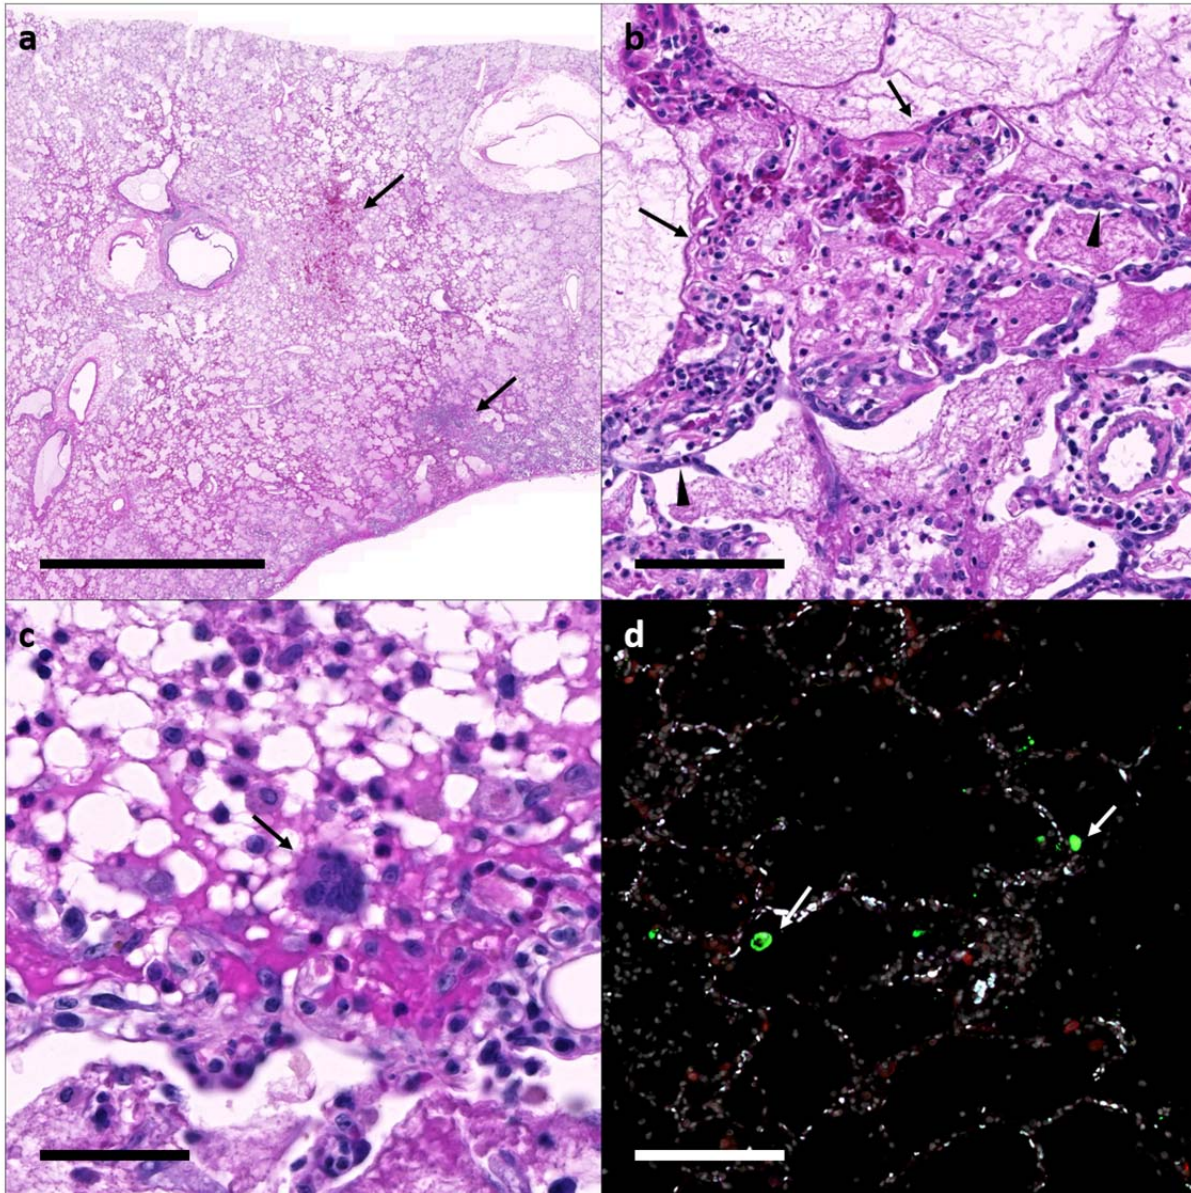

387

388 **Figure 4 | Histopathology and fluorescent immunohistochemistry in AGM1.** (a) The right  
389 lower lung lobe is filled with fibrin and edema with areas of hemorrhage and necrosis (arrows);  
390 Bar = 5 mm. (b) Alveoli are variably lined by hyaline membranes (arrows) and type II  
391 pneumocytes (arrowheads); Bar = 100  $\mu$ m. (c) Rare multinucleated syncytia (arrow) are scattered  
392 throughout the affected lungs; Bar = 50  $\mu$ m. (d) Fluorescent immunohistochemistry for COV-2  
393 nucleoprotein (green, arrows) and ACE2 (red) identified low numbers of CoV-2 positive cells  
394 within the affected lung lobes; Bar = 100  $\mu$ m. White: DAPI/nuclei; Green: CoV-2; Red: ACE2  
395 Blue: Empty.

396

397

398



## 399 **Methods**

### 400 **Ethics Statement**

401 The Institutional Animal Care and Use Committee of Tulane University reviewed and approved  
402 all the procedures for this experiment. The Tulane National Primate Research Center is fully  
403 accredited by the AAALAC. All animals were cared for in accordance with the ILAR Guide for  
404 the Care and Use of Laboratory Animals 8<sup>th</sup> Edition. The Tulane University Institutional  
405 Biosafety Committee approved the procedures for sample handling, inactivation, and removal  
406 from BSL3 containment.

### 407 **Virus**

408 The virus used for experimental infection was SARS-CoV-2; 2019-nCoV/USA-WA1/2020  
409 (MN985325.1). Virus stock was prepared in Vero E6 cells and sequence confirmed by PCR  
410 and/or Sanger sequencing. Plaque assays were performed in Vero E6 cells.

### 411 **Animals and procedures**

412 A total of four, aged ( $\approx$ 16 years of age), wild-caught AGM (2M, 2F) were used in this study.  
413 Animals (n=2, 1M, 1F) were exposed to SARS-CoV-2 either by small particle aerosol<sup>38</sup> or  
414 multiroute combination. The 2 animals (AGM1, AGM4) exposed by aerosol received an inhaled  
415 dose of  $2.0 \times 10^3$  and  $2.5 \times 10^3$  PFU, respectively. AGM2 and AGM3 were exposed by inoculating  
416 a cumulative dose of  $3.61 \times 10^6$  PFU through multiple routes (oral, 1 mL; nasal, 1 mL;  
417 intratracheal, 1 mL; conjunctival, 50  $\mu$ L per eye). Animals were observed for 21 days including  
418 twice daily monitoring. Pre- and postexposure samples included blood, CSF, feces, urine,  
419 bronchioalveolar lavage, and mucosal swabs (buccal, nasal, pharyngeal, rectal, vaginal, and  
420 bronchial brush). Blood was collected at postexposure days -14, 1, 3 (aerosol) or 4 (multiroute),  
421 7, 14, 21, and at necropsy. CSF, feces, urine, bronchioalveolar lavage, and mucosal swabs were  
422 collected at postexposure days -14, 7, 14, 21, and at necropsy. Physical exam, plethysmography,  
423 and imaging (radiographs and PET/CT) occurred 7 days prior to exposure and then weekly  
424 thereafter. Animals were euthanized for necropsy after three weeks postexposure, or when  
425 humane end points were reached.

### 426 **Necropsy**

427 Postmortem examination was performed by a board-certified veterinary pathologist. Blood was  
428 collected via intracardiac aspiration. Euthanasia was performed by intracardiac installation of 2  
429 mL of sodium pentobarbital. CSF was collected from the atlanto-occipital space (cisterna  
430 magna). Mucosal swabs were collected from the oral cavity, nasal cavity, pharynx, rectum, and  
431 vagina. The pluck was removed in its entirety. The left and right lungs were photographed and  
432 weighed separately. A bronchial brush was used to sample the mainstem bronchi of the right and  
433 left lower lobes. Bronchioalveolar lavage was performed on the right caudal lung lobe. Samples  
434 from the left anterior and caudal lung lobes were collected fresh and in media for further  
435 processing. All right lung lobes were infused and stored in fixative for microscopic evaluation.  
436 The remainder of the necropsy was performed routinely with collection of tissues in media,  
437 fixative, or fresh.

438 Tissue samples were fixed in Z-fix (Anatech), embedded in paraffin and 5  $\mu$ m thick sections  
439 were cut, adhered to charged glass slides and stained routinely. Tissue examined microscopically  
440 included: nasal turbinate, nasopharynx, trachea, carotid artery, aorta, heart, tongue, salivary  
441 gland, esophagus, stomach, duodenum, jejunum, pancreas, ileocecal junction, colon (ascending,  
442 transverse, descending), rectum, liver, gall bladder, spleen, kidney, urinary bladder, thyroid,  
443 pituitary, adrenal, lymph nodes (bronchial, mesenteric, submandibular, cervical, axillary,  
444 inguinal, bronchial), tonsils (palatine, lingual), brain (olfactory bulb, frontal cortex, temporal  
445 cortex, parietal cortex, occipital cortex, basal ganglia, cerebellum, brainstem), spinal cord  
446 (cervical), and reproductive system (ovary, uterus, vagina or testis, seminal vesicle, prostate).

447 All slides were scanned on a Zeiss Axio Scan.Z1 digital slide scanner. Images and figures were  
448 made using HALO software (Indica Labs).

#### 449 **Quantification of Swab Viral RNA**

450 Swab and bronchial brush samples were collected in 200  $\mu$ L of DNA/RNA Shield 1x (Cat.#  
451 R1200, Zymo Research, Irvine, CA) and extracted for Viral RNA (vRNA) using the Quick-RNA  
452 Viral kit (Cat.# R1034/5, Zymo Research). The Viral RNA Buffer was dispensed directly to the  
453 swab in the DNA/RNA Shield. A modification to the manufacturers' protocol was made to insert  
454 the swab directly into the spin column to centrifugate allowing all the solution to cross the spin  
455 column membrane. The vRNA was the eluted (45  $\mu$ L) from which 5  $\mu$ L was added in a 0.1 mL  
456 fast 96-well optical microtiter plate format (Cat #4346906, Thermo Fisher, CA) for a 20  $\mu$ L RT-  
457 qPCR reaction. The RT-qPCR reaction used TaqPath 1-Step Multiplex Master Mix (Cat.#  
458 A28527, Thermo Fisher) along with 2019-nCoV RUO Kit (Cat.# 10006713, IDTDNA,  
459 Coralville, IA) a premix of forward and reverse primers and a FAM labeled probe targeting the  
460 N1 amplicon of N gene of SARS2-nCoV19 (accession MN908947). The reaction master mix  
461 were added using an X-stream repeating pipette (Eppendorf, Hauppauge, NY) to the microtiter  
462 plates which were covered with optical film (cat. #4311971; Thermo Fisher), vortexed, and pulse  
463 centrifuged. The RT-qPCR reaction was subjected to RT-qPCR a program of, UNG incubation at  
464 25°C for 2 minutes, RT incubation at 50°C for 15 minutes, and an enzyme activation at 95°C for  
465 2 minutes followed by 40 cycles of a denaturing step at 95°C for 3 seconds and annealing at  
466 60°C for 30 seconds. Fluorescence signals were detected with an Applied Biosystems  
467 QuantStudio 6 Sequence Detector. Data were captured and analyzed with Sequence Detector  
468 Software v1.3 (Applied Biosystems, Foster City, CA). Viral copy numbers were calculated by  
469 plotting Cq values obtained from unknown (i.e. test) samples against a standard curve  
470 representing known viral copy numbers. The limit of detection of the assay was 10 copies per  
471 reaction volume. A 2019-nCoV positive control (Cat.# 10006625, IDTDNA) were analyzed in  
472 parallel with every set of test samples to verify that the RT-qPCR master mix and reagents were  
473 prepared correctly to produce amplification of the target nucleic acid. A non-template control  
474 (NTC) was included in the qPCR to ensure that there was no cross-contamination between  
475 reactions.

#### 476 **Immunohistochemistry**

477 Sum sections of Formalin-fixed, paraffin-embedded lung were mounted on charged glass slides,  
478 baked overnight at 56°C and passed through Xylene, graded ethanol, and double distilled water  
479 to remove paraffin and rehydrate tissue sections. A microwave was used for heat induced epitope  
480 retrieval. Slides were heated in a high pH solution (Vector Labs H-3301), rinsed in hot water and  
481 transferred to a heated low pH solution (Vector Labs H-3300) where they were allowed to cool  
482 to room temperature. Sections were washed in a solution of phosphate-buffered saline and fish  
483 gelatin (PBS-FSG) and transferred to a humidified chamber. Tissues were blocked with 10%  
484 normal goat serum (NGS) for 40 minutes, followed by a 60-minute incubation with the primary  
485 antibodies (SARS-CoV-2 nucleoprotein, mouse IgG1 (Sino Biological, cat#40143-MM08);  
486 ACE2, rabbit polyclonal (Millipore, cat# HPA000288); Iba-1, rabbit polyclonal (Wako, cat#  
487 019-19741); or pancytokeratin, rabbit polyclonal (Dako, cat#Z0622)) diluted in NGS at a  
488 concentration of 1:200 and 1:100, respectively). Slides were washed twice in PBS-FSG with  
489 Tritonx100, followed by a third wash in PBS-FSG. Slides were transferred to the humidified  
490 chamber and incubated, for 40 minutes, with secondary antibodies tagged with Alexa Fluor  
491 fluorochromes and diluted 1:1000 in NGS. Following washes, DAPI (4',6-diamidino-2-  
492 phenylindole) was used to label the nuclei of each section. Slides were mounted using a  
493 homemade anti-queenching mounting media containing Mowiol (Calbiochem #475904) and  
494 DABCO (Sigma #D2522) and imaged with a Zeiss Axio Slide Scanner.

#### 495 **Cytokine Production in Plasma**

496 Plasma was collected by spinning and was thawed before use. Cytokines were measured using  
497 Mesoscale Discovery using a V-Plex Proinflammatory Panel 1, 10-Plex (IFN- $\gamma$ , IL-1 $\beta$ , IL-2, IL-  
498 4, IL-6, IL-8, IL-10, IL-12p70, IL-13, TNF- $\alpha$ ) (#K15049D, Mesoscale Discovery, Rockville,  
499 Maryland) following the instructions of the kit. The plate was read on a MESO Quick Plex  
500 SQ120 machine.

501 Heatmaps were generated using the 'pheatmap' package in R<sup>39,40</sup>. Data were normalized by  
502 dividing raw values at week 1 and necropsy by baseline values for each animal, followed by the  
503 application of log2. Values below the limit of detection were replaced with the lowest limit of  
504 detection value based on the standard curve for each run, or with the lowest value detected  
505 during the run, whichever was smaller. Polar coordinate plots were generated using the 'ggplot2'  
506 package in R<sup>41,40,40,39</sup>, using the same normalized data shown in the heatmap. Scatterplots were  
507 drawn using raw data points and display Pearson's correlation coefficients and a 95% confidence  
508 interval.

509

#### 510 **Detection of binding IgG antibody in serum**

511 Serum samples collected at preinfection and at necropsy were tested for binding IgG antibodies  
512 against SARS-CoV-2 S1/S2 proteins using an ELISA kit from XpressBio (cat# SP864C). The  
513 assays were performed per directions of the manufacturer. In brief, the serum was diluted 1:50 in  
514 Sample Diluent. One hundred microliters of diluted serum were pipetted into the wells of the  
515 ELISA plate. The plate was covered and incubated at 37° C for 45 min. After incubation, the  
516 wells were washed 5 times with 1X wash solution. One hundred microliters of Peroxidase  
517 Conjugate were pipetted into each test well. The plate was covered and incubated at 37° C for 45

518 min. After incubation, the wells were washed 5 times with 1X Wash solution. One hundred  
519 microliters of ABTS Peroxidase Substrate was pipetted into each test well. The plate was  
520 incubated at room temperature for 30 minutes. The absorbance of the colorimetric reaction was  
521 read at 405 nm.

## 522 **Data Availability**

523 The raw data that supports the findings of this study will be supplied upon request to the  
524 corresponding author. Material requests can be made to the Tulane National Primate Research  
525 Center. Approved requests for materials will be released after completion of a material transfer  
526 agreement. The raw data supporting the findings and figures has been placed in a public data  
527 repository which can be accessed here: <https://figshare.com/s/0436bb616239b57dc007> and will  
528 be made public prior to publication.

## 529 **Acknowledgements**

530 We would like to acknowledge Natalie Thornburg at the NCIRD for her help acquiring and  
531 characterizing the viral stock used in this infection study. We would like to thank the NIH for  
532 supporting this work through the TNPRC base grant (P51 OD011104 59).

## 533 **Author Contributions**

534 RVB lead pathologist and author. MV performed cytokine assay, composed figures, and  
535 contributed to writing the manuscript. LADM was the project veterinarian, contributed to study  
536 design, and writing of the IACUC and manuscript. CJR conceived and performed aerosol  
537 experiments and contributed to writing the manuscript. Kasi Russell-Lodrigue was a project  
538 veterinarian, made clinical assessments and collected samples. Marissa Fahlberg analyzed  
539 cytokine data and made figures. CJM processed and analyzed samples for RT-qPCR, contributed  
540 to writing the manuscript. BB collected and analyzed data. KSP, JAP, SCW provided large  
541 preparations of deep sequenced virus from WRCEVA collection. XQ contributed reagents and to  
542 the conceptual development of the study. CCM designed IHC panels and performed all the  
543 staining. GL contributed to study design, provided administrative support, and aided with sample  
544 processing and archiving. NG contributed to study design, study coordination, sample  
545 processing, and SOP development. BT, TP contributed to sample processing including RT-  
546 qPCR, fluids, swabs, and necropsy tissues. CA analysis and interpretation of antibody data and  
547 revision of manuscript. MBB analysis and interpretation of antibody data. MP performed  
548 antibody testing. PKD processed and analyzed viral load data. NJM analyzed data and  
549 contributed to writing the manuscript. AB reviewed and optimized all technical SOPs and was  
550 responsible for safety of this study. TF contributed to study design, planning, and writing of the  
551 manuscript. RPB contributed to study design, analysis of clinical and imaging results, and  
552 writing the manuscripts. JR conceived, designed, and supported study, analyzed data, contributed  
553 to writing the manuscript.

## 554 **Ethics Declaration**

555 These authors declare no competing interests.

556 **Extended Data.**

| ID   | Species                     | Source                 | Age (est. yr) | Sex | Weight (kg) | Exposure (dose)                         |
|------|-----------------------------|------------------------|---------------|-----|-------------|-----------------------------------------|
| AGM1 | <i>Chlorocebus aethiops</i> | Wild caught, St. Kitts | 16            | F   | 4.3         | Aerosol<br>( $2.0 \times 10^3$ PFU)     |
| AGM2 | <i>Chlorocebus aethiops</i> | Wild caught, St. Kitts | 16            | F   | 3.9         | Multiroute<br>( $3.61 \times 10^6$ PFU) |
| AGM3 | <i>Chlorocebus aethiops</i> | Wild caught, St. Kitts | 16            | M   | 6.9         | Multiroute<br>( $3.61 \times 10^6$ PFU) |
| AGM4 | <i>Chlorocebus aethiops</i> | Wild caught, St. Kitts | 16            | M   | 7.5         | Aerosol<br>( $2.5 \times 10^3$ PFU)     |

557  
558

559 **Extended Data Table 1 | Animal information.** Species, source, route and dose of exposure, and  
560 demographic information from each animal in the study.

561



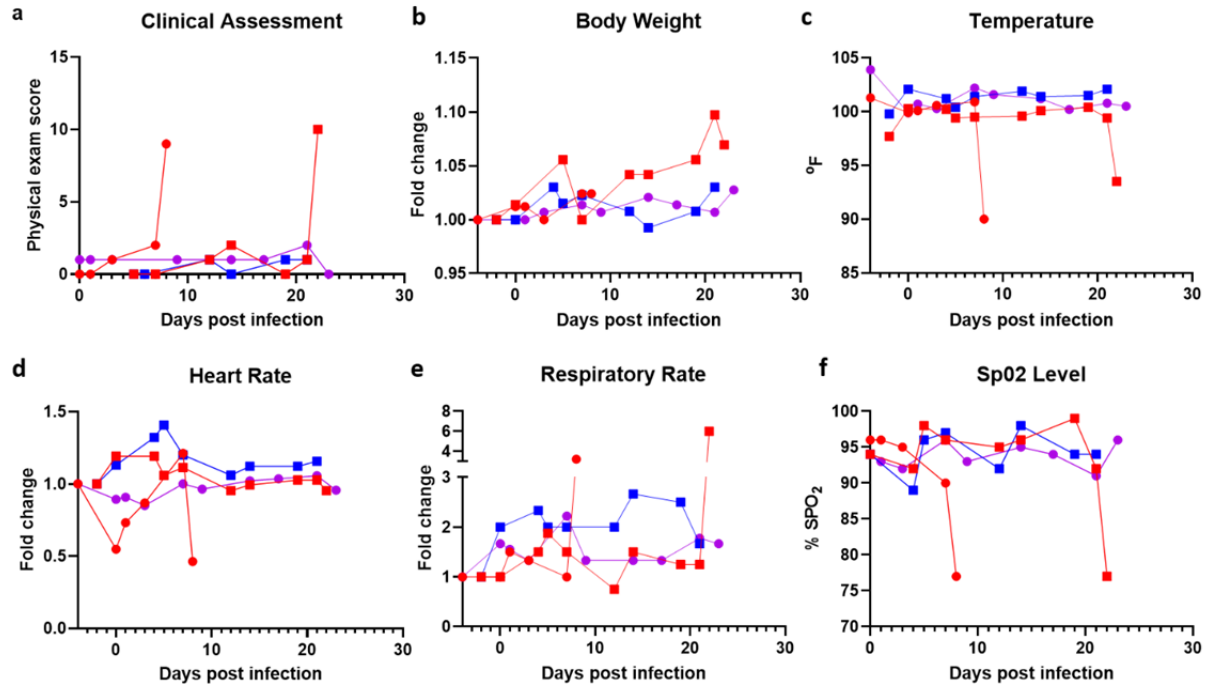

562

563 **Extended Data Figure 1 | Clinical parameters of African Green Monkeys following**  
564 **exposure to SARS-CoV-2.** There were no significant differences in clinical parameters leading  
565 up to development of ARDS in the two animals that progressed (red). Progression to ARDS was  
566 associated with spike in physical exam scores, respiratory rate, and a dramatic decline in SPO<sub>2</sub>.  
567 Neither weight loss nor fever were associated with SARS-CoV-2 exposure in any of the four  
568 animals. Circles: aerosol exposure; Squares: multiroute exposure; Red: developed ARDS;  
569 Purple: cytokine storm without ARDS; Blue: no cytokine storm or ARDS

570

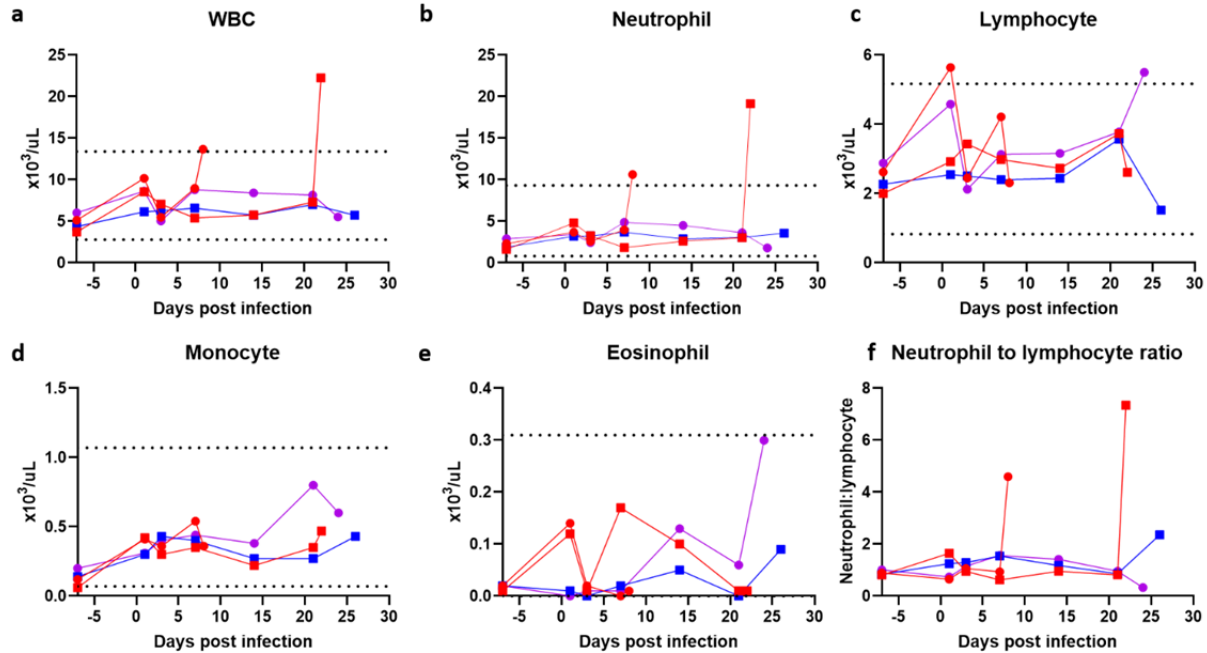

571

572 **Extended Data Figure 2 | Longitudinal fold changes in leukogram values.** The animals that  
573 progressed to ARDS (red) did not differ significantly from the nonprogressors (blue and purple),  
574 except at terminal timepoints when a spike in WBC, neutrophils, and NLR was observed. All  
575 animals exhibited an increase in monocyte numbers from baseline values. Circles: aerosol  
576 exposure; Squares: multiroute exposure; Red: developed ARDS; Purple: cytokine storm without  
577 ARDS; Blue: no cytokine storm or ARDS. Dashed lines are the upper and lower bounds of the  
578 reference range for the parameter.

579

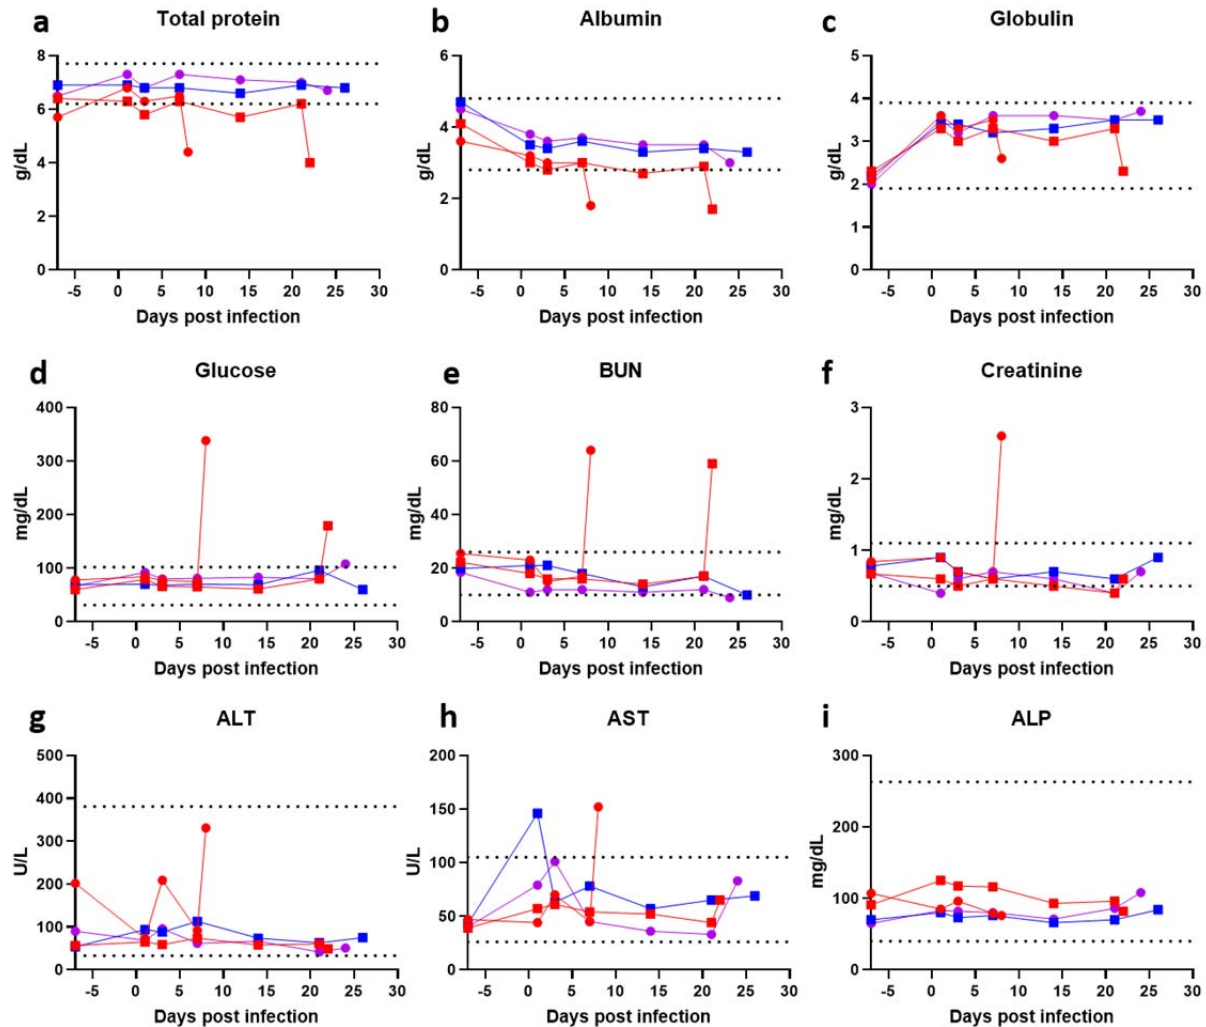

580

581 **Extended Data Figure 3 | Longitudinal fold changes in serum chemistry values.** Animals  
582 that progressed to ARDS (red) did not differ significantly from nonprogressors (purple and blue)  
583 throughout the course of the study. On the day of necropsy disease progression was associated  
584 with a decrease in total protein, albumin, and globulin along with an increase in glucose, blood  
585 urea nitrogen, creatinine, and AST in both animals. Circles: aerosol exposure; Squares:  
586 multiroute exposure; Red: developed ARDS; Purple: cytokine storm without ARDS; Blue: no  
587 cytokine storm or ARDS. Dashed lines are the upper and lower bounds of the reference range for  
588 the parameter.

589

590

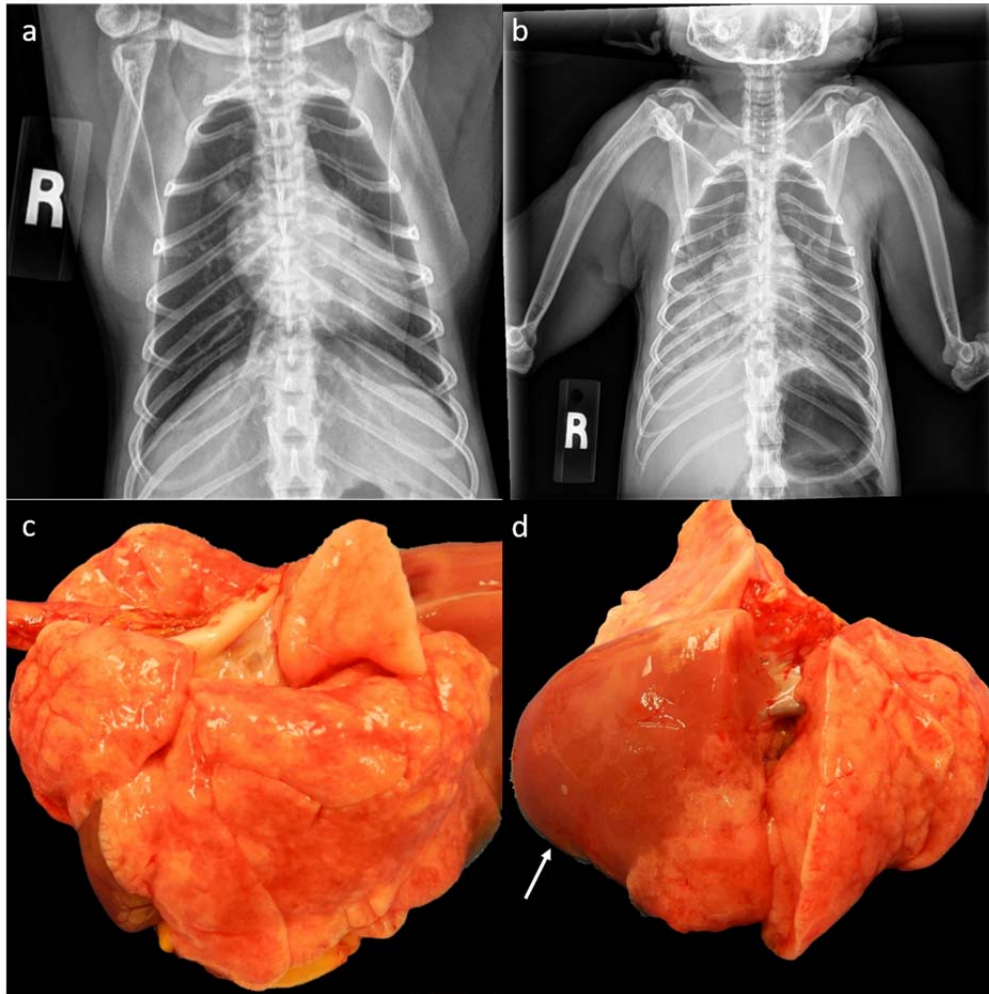

591

592 **Extended Data Figure 4 | Radiographic and gross pathologic findings of AGM2.**

593 Radiographs 24 hours before (a) and at the time of necropsy (b) showing the rapid development  
594 of alveolar lung opacities throughout the right lung lobes. (c) The left lung exhibits mild  
595 congestion and edema. (d) There is extensive consolidation of the right lower lung lobe with  
596 pulmonary edema (arrow). The right middle and anterior lobes are less affected. On cut surface  
597 all lobes ooze copious fluid.

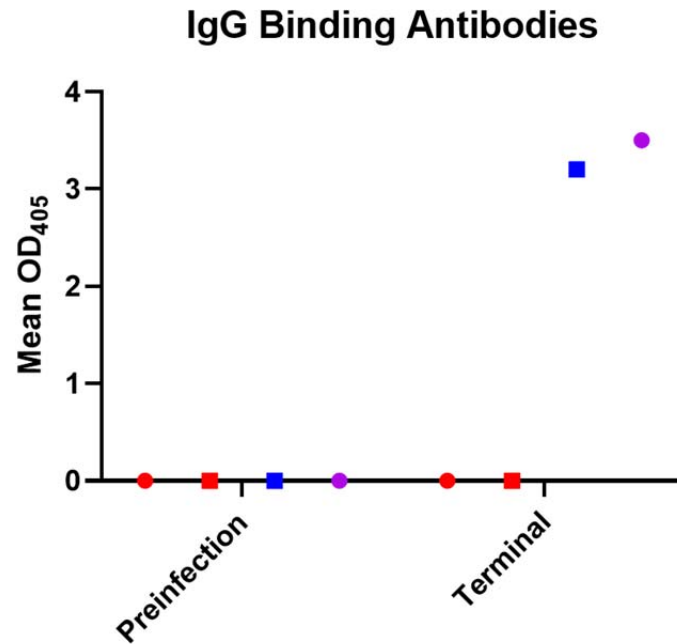

598

599 **Extended Data Figure 5 | Serum IgG binding antibodies.** An ELISA kit was used to detect  
600 binding antibodies to SARS-CoV-2 S1/S2 proteins. At terminal timepoints antibodies were not  
601 detected in the 2 animals that progressed to ARDS but were detected in the 2 animals that  
602 reached study endpoint. None of the animals had detectable antibodies prior to infection. Circles:  
603 aerosol exposure; Squares: multiroute exposure; Red: developed ARDS; Purple: cytokine storm  
604 without ARDS; Blue: no cytokine storm or ARDS

605
